# Supplementary material
Source: Royal Society of Chemistry journal article supplement (doi:10.1039/d6cc00719h)
Supplement: d6cc00719h1.pdf [file d6cc00719h1.pdf]

## Supporting Information

### Fabrication of lithium phenoxide complexes for hydrogen storage evaluation

Nor Izzati Nordin<sup>a</sup>, Khai Chen Tan<sup>b,c</sup>, Teng He<sup>\*b,c</sup>, Ping Chen<sup>b,c</sup>, and Yong Shen Chua<sup>\*a</sup>

<sup>a</sup> *Hydrogen Energy Storage Research Group, School of Chemical Sciences, Universiti Sains Malaysia, Penang, 11800, Malaysia;*

<sup>b</sup> *Dalian Institute of Chemical Physics, Chinese Academy of Sciences, Dalian, 116023, China.*

<sup>c</sup> *Center of Materials Science and Optoelectronics Engineering, University of Chinese Academy of Sciences, Beijing, 100049, China;*

\* Corresponding authors:

E-mail address: yschua@usm.my (Y. S. Chua); heteng@dicp.ac.cn (T. He)

## Table of Contents

|                                                                                                                                                                                                                                                                                                                                                                         |     |
|-------------------------------------------------------------------------------------------------------------------------------------------------------------------------------------------------------------------------------------------------------------------------------------------------------------------------------------------------------------------------|-----|
| Table of Content.....                                                                                                                                                                                                                                                                                                                                                   | S2  |
| Experimental data.....                                                                                                                                                                                                                                                                                                                                                  | S4  |
| Spectroscopic data.....                                                                                                                                                                                                                                                                                                                                                 | S5  |
| Table S1. Solid-state hydrogen absorption of Li(C <sub>6</sub> H <sub>5</sub> O) and different molar ratios of LiOH/C <sub>6</sub> H <sub>5</sub> OH under 30 bar H <sub>2</sub> , aided by a 1:10 catalyst to sample ratio. Solvent-less hydrogen absorption of C <sub>6</sub> H <sub>5</sub> OH was carried out under the same conditions for comparison purposes.... | S6  |
| Table S2. Solid-state hydrogen desorption of C <sub>6</sub> H <sub>11</sub> OH, hydrogenated sample of Li(C <sub>6</sub> H <sub>5</sub> O), and different molar ratios of LiOH/C <sub>6</sub> H <sub>5</sub> OH under vacuum.....                                                                                                                                       | S7  |
| Figure S1. Product selectivity from hydrogenation of as-synthesized 1.1:1 LiOH/C <sub>6</sub> H <sub>5</sub> OH at 90 °C, 3.5 h catalyzed by 5 wt% metal catalysts with a molar ratio of metal catalyst to phenoxide of 1:10.....                                                                                                                                       | S8  |
| Figure S2. Hydrogen uptake curves of as-synthesized 1.1:1 and 2:1 LiOH/C <sub>6</sub> H <sub>5</sub> OH over 5 wt% Ru/Al <sub>2</sub> O <sub>3</sub> under 30 bar of H <sub>2</sub> at 90 °C with a molar ratio of metal catalyst to phenoxide of 1:10.....                                                                                                             | S9  |
| Figure S3. Product selectivity from hydrogenation of as-synthesized different ratios of LiOH/C <sub>6</sub> H <sub>5</sub> OH at 90 °C, 3.5 h catalyzed by 5 wt% Ru/Al <sub>2</sub> O <sub>3</sub> with a molar ratio of metal catalyst to phenol or phenoxide of 1:10.....                                                                                             | S10 |
| Figure S4. <sup>1</sup> H NMR spectra of the dehydrogenation of cyclohexanol at 140 °C, 10 h over different metal catalysts with a molar ratio of metal catalyst to cyclohexanol of 1:10 in DMSO- <i>d</i> <sub>6</sub> .....                                                                                                                                           | S11 |
| Figure S5. Product selectivity from the dehydrogenation of cyclohexanol at 140 °C, 10 h over different metal catalysts with a molar ratio of metal catalyst to cyclohexanol of 1:10.....                                                                                                                                                                                | S12 |
| Figure S6. <sup>1</sup> H NMR spectra of the dehydrogenation of cyclohexanol at 140 °C, 10 h over different metal catalysts with a molar ratio of metal catalyst to cyclohexanol of 1:10 in DMSO- <i>d</i> <sub>6</sub> .....                                                                                                                                           | S13 |
| Figure S7. Product selectivity from the dehydrogenation of cyclohexanol at 260 °C, 10 h over different metal catalysts with a molar ratio of metal catalyst to cyclohexanol of 1:10.....                                                                                                                                                                                | S14 |
| Figure S8. Product selectivity from the dehydrogenation of hydrogenated Li(C <sub>6</sub> H <sub>5</sub> O) at 140 °C, 10 h catalyzed by 5 wt% metal catalysts.....                                                                                                                                                                                                     | S15 |
| Figure S9. Product selectivity from the dehydrogenation of hydrogenated samples synthesized from different ratios of LiOH/C <sub>6</sub> H <sub>5</sub> OH at 140 °C, 10 h catalyzed by 5 wt% metal catalysts.....                                                                                                                                                      | S16 |
| Reference.....                                                                                                                                                                                                                                                                                                                                                          | S16 |

## Experimental Section

### Synthesis of metalorganic compound, Li(C<sub>6</sub>H<sub>5</sub>O)

Li(C<sub>6</sub>H<sub>5</sub>O) was synthesized as illustrated in **Scheme S1** by reacting lithium hydroxide (LiOH, 98 %, Acros Organic) with phenol (C<sub>6</sub>H<sub>5</sub>OH, 99 %, Alfa Aesar) in a 1.1:1 molar ratio. In a typical procedure, 0.011 mol LiOH and 0.01 mol C<sub>6</sub>H<sub>5</sub>OH were dissolved in 30 mL of tetrahydrofuran (THF, (CH<sub>2</sub>)<sub>4</sub>O, QReC) and stirred for 24 h. After the reaction, the solvent was removed under vacuum at 100 °C, yielding a solvent-free white powder. To prepare lithium hydroxide-phenoxide and lithium phenoxide-phenol complexes, the same procedure was followed using different LiOH/C<sub>6</sub>H<sub>5</sub>OH molar ratios of 2:1, 1:2, 1:3, 1:4, and 1:6. THF was specifically chosen over water as the reaction medium to avoid introducing excess water into the final product. Although one mole of water is generated as a byproduct during the reaction, its amount is negligible relative to the sample mass and can be easily removed, unlike when water is used as the primary solvent. Replacing water with a low surface tension solvent is preferred to avoid particle agglomeration during the drying process.<sup>[28]</sup> Additionally, THF offers a significantly lower boiling point compared to water, enabling the production of moisture-free products in a shorter time

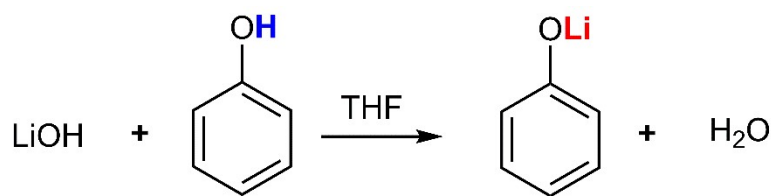

**Scheme S1.** Synthetic route for the preparation of Li(C<sub>6</sub>H<sub>5</sub>O).

### Sample characterizations

The formation of Li(C<sub>6</sub>H<sub>5</sub>O) was confirmed by proton Nuclear Magnetic Resonance (<sup>1</sup>H NMR) spectroscopy using a Bruker Avance 500 operating at a resonance frequency of 500 MHz with dimethyl sulfoxide-*d*<sub>6</sub> (DMSO-*d*<sub>6</sub>: 2.50 ppm) as the deuterated solvent. Chemical shifts were reported in ppm relative to an external reference of tetramethylsilane (TMS). Structural characterization of the synthesized samples was performed using X-ray powder diffraction (XRD) on a Bruker D8 Advance diffractometer operated in continuous scanning mode with a copper (Cu) X-ray source ( $\lambda = 1.5406 \text{ \AA}$ ; 40 kV; 40 mA). Diffraction patterns were recorded over a  $2\theta$  range of 5°–80° at a scan rate of 2 °C min<sup>-1</sup> and a step size of 0.02°. The vibrational properties of key chemical bonds, particularly O–H, C–O, and Li–O, were analyzed using Fourier Transform Infrared (FTIR) spectroscopy on a Shimadzu IRSpirit (A224160) in the spectral range of 400–4000 cm<sup>-1</sup>.

### Catalytic hydrogenation and dehydrogenation

In this study, solvent-free (de)hydrogenation were employed to eliminate the contribution of solvent dead weight contribution which would otherwise reduce the overall gravimetric hydrogen storage density of the system. The hydrogen storage performance of as-synthesized

samples was evaluated using a metal catalyst to sample molar ratio of 1:10. The solid mixture was prepared by thoroughly grinding the synthesized sample with the selected commercial catalyst before transferring it into a stainless-steel tube reactor. Hydrogenation was performed isothermally at 90 °C under 30 bar of H<sub>2</sub> using a custom-designed volumetric release system for several hours. Whilst the hydrogenation was carried out using the as-synthesized samples (1.1:1, 2:1, 1:2, and 1:6), direct dehydrogenation reaction was performed on the hydrogenated products at 140 °C under vacuum to promote the hydrogen release. The products of hydrogen uptake and release were analyzed and quantified by <sup>1</sup>H NMR spectroscopy. For comparative evaluation, the performance of newly synthesized samples was assessed alongside that of pristine phenol (C<sub>6</sub>H<sub>5</sub>OH, 99 % Alfa Aesar) and cyclohexanol (C<sub>6</sub>H<sub>11</sub>OH, 98 %, QReC), using various commercial noble metal catalysts, namely, 5 wt % Ru/Al<sub>2</sub>O<sub>3</sub> (99 %, Sigma Aldrich), 5 wt % Ru/Al<sub>2</sub>O<sub>3</sub> (99 %, Acros Organic), 5 wt % Pd/C (99 %, Alfa Aesar), and 5 wt % Pt/C (99 %, Sigma Aldrich). Both the unsaturated aromatic ring in C<sub>6</sub>H<sub>5</sub>OH and its lithiated form, Li(C<sub>6</sub>H<sub>5</sub>O), are capable of absorbing up to six equivalents of hydrogen atoms during hydrogenation, as illustrated in **Scheme S2**.

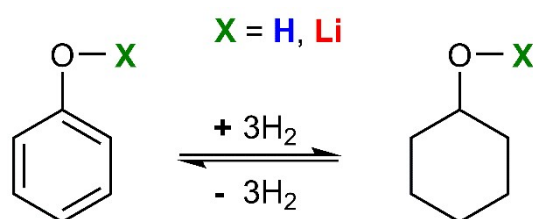

**Scheme S2.** Hydrogenation and dehydrogenation of Li(C<sub>6</sub>H<sub>5</sub>O).

The reaction conversion and product selectivity were determined using <sup>1</sup>H NMR spectroscopy. For each compound, the integral of a selected proton signal was used to calculate conversion and selectivity.

The conversion of the substrate was calculated as:

$$\text{Percentage of remaining substrate, } S (\%) = (I_0 / \sum I_a) \times 100\%$$

$$\text{Conversion } (\%) = 100 - S$$

where  $I_0$  is the integral of the substrate and  $I_a$  is the sum of the integrals of all products including the remaining substrate

The selectivity of each product was calculated as:

$$\text{Selectivity } (\%) = (I_i / \sum I_k) \times 100\%$$

Where  $I_i$  is the integral of the individual product and  $I_k$  is the sum of the integrals of all products.

### Spectroscopic data:

NMR multiplicities are reported as singlet (s), doublet (d), triplet (t), and multiplet (m). FTIR band are assigned as stretching ( $\nu$ ), and bending ( $\delta$ ) with peak intensities reported as weak (w), medium (m), strong (s), and broad (b).

*Lithium phenoxide (1:1:1) LiOH/C<sub>6</sub>H<sub>5</sub>OH*: <sup>1</sup>H NMR (500 MHz, DMSO-*d*<sub>6</sub>)  $\delta$  = 6.91 – 6.85 (t, *J*=7.6, 2H, CH), 6.50 – 6.44 (d, *J*=7.9, 2H, CH), 6.23 – 6.16 (t, *J*=7.2, 1H, CH). FTIR (KBr cm<sup>-1</sup>): 3057, 3022  $\nu$ C–H (w), 1266  $\nu$ C–O (s), 598  $\nu$ Li–O (s), 434  $\delta$ Li–O (m)

*Lithium-rich complex (2:1) LiOH/C<sub>6</sub>H<sub>5</sub>OH*: <sup>1</sup>H NMR (500 MHz, DMSO-*d*<sub>6</sub>)  $\delta$  = 6.88 – 6.76 (t, *J*=7.5, 2H, CH), 6.44 – 6.30 (d, *J*=7.9, 2H, CH), 6.15 – 6.06 (t, *J*=7.3, 1H, CH). FTIR (KBr cm<sup>-1</sup>): 3057, 3022  $\nu$ C–H (w); 1266  $\nu$ C–O (s); 598  $\nu$ Li–O (s); 433  $\delta$ Li–O (s)

*Phenol-rich complex (1:2) LiOH/C<sub>6</sub>H<sub>5</sub>OH*: <sup>1</sup>H NMR (500 MHz, DMSO-*d*<sub>6</sub>)  $\delta$  = 6.98 – 6.88 (t, *J*=7.6, 2H, CH), 6.59 – 6.50 (d, *J*=7.8, 2H, CH), 6.31 – 6.24 (t, *J*=7.2, 1H, CH). FTIR (KBr cm<sup>-1</sup>): 3309  $\nu$ O–H; (w,b); 3057, 3022  $\nu$ C–H (w); 1266  $\nu$ C–O (s); 598  $\nu$ Li–O (m); 434  $\delta$ Li–O (w)

*Phenol-rich complex (1:3) LiOH/C<sub>6</sub>H<sub>5</sub>OH*: <sup>1</sup>H NMR (500 MHz, DMSO-*d*<sub>6</sub>)  $\delta$  = 7.85 (s, 1H, OH),  $\delta$  = 7.05 – 6.98 (t, *J*=7.6, 2H, CH), 6.71 – 6.64 (d, *J*=7.9, 2H, CH), 6.52 – 6.45 (t, *J*=7.2, 1H, CH). FTIR (KBr cm<sup>-1</sup>): 3309  $\nu$ O–H; (b); 1370  $\delta$ O–H (m); 3057, 3022  $\nu$ C–H (w); 1242  $\nu$ C–O (s,b); 598  $\nu$ Li–O (m); 430  $\delta$ Li–O (w)

*Phenol-rich complex (1:4) LiOH/C<sub>6</sub>H<sub>5</sub>OH*: <sup>1</sup>H NMR (500 MHz, DMSO-*d*<sub>6</sub>)  $\delta$  = 8.82 (s, 1H, OH), 7.10 – 6.96 (t, *J*=7.7, 2H, CH), 6.72 – 6.62 (d, *J*=8.0, 2H, CH), 6.56 – 6.49 (t, *J*=7.2, 1H, CH). FTIR (KBr cm<sup>-1</sup>): 3309  $\nu$ O–H; (b); 1370  $\delta$ O–H (m); 3057, 3022  $\nu$ C–H (w); 1235  $\nu$ C–O (s,b); 435  $\delta$ Li–O (w)

*Phenol-rich complex (1:6) LiOH/C<sub>6</sub>H<sub>5</sub>OH*: <sup>1</sup>H NMR (500 MHz, DMSO-*d*<sub>6</sub>)  $\delta$  = 9.67 (s, 1H, OH), 7.13 – 7.05 (m, 2H, CH), 6.79 – 6.72 (m, 2H, CH), 6.67 – 6.61 (m, 1H, CH). FTIR (KBr cm<sup>-1</sup>): 3296  $\nu$ O–H; (b); 1370  $\delta$ O–H (m); 3057, 3022  $\nu$ C–H (w); 1235  $\nu$ C–O (s); 435  $\delta$ Li–O (w)

*Phenol C<sub>6</sub>H<sub>5</sub>OH*: <sup>1</sup>H NMR (500 MHz, DMSO-*d*<sub>6</sub>)  $\delta$  = 9.39 (s, 1H, OH), 7.21 – 7.13 (m, 2H, CH), 6.83 – 6.77 (m, 2H, CH), 6.77 (m, 1H, CH). FTIR (KBr cm<sup>-1</sup>): 3345  $\nu$ O–H, (b); 1370  $\delta$ O–H (m); 3047, 3021  $\nu$ C–H (w); 1232  $\nu$ C–O (s).

*Cyclohexanol C<sub>6</sub>H<sub>11</sub>OH*: <sup>1</sup>H NMR (500 MHz, DMSO-*d*<sub>6</sub>)  $\delta$  = 4.66 (s, 1H, OH), 3.45 – 3.30 (m, 1H, CH), 1.81 – 1.57 (m, 4H, CH<sub>2</sub>), 1.49 – 1.40 (m, 1H, CH<sub>2</sub>), 1.24 – 1.01 (m, 5H, CH<sub>2</sub>).

**Table S1.** Solid-state hydrogen absorption of Li(C<sub>6</sub>H<sub>5</sub>O) and different molar ratios of LiOH/C<sub>6</sub>H<sub>5</sub>OH under 30 bar H<sub>2</sub>, aided by a 1:10 catalyst to sample ratio. Solvent-less hydrogen absorption of C<sub>6</sub>H<sub>5</sub>OH was carried out under the same conditions for comparison purposes.

| Entry | Sample<br>(LiOH/C <sub>6</sub> H <sub>5</sub> OH)           | Hydrogen absorption               |                               |                                  |
|-------|-------------------------------------------------------------|-----------------------------------|-------------------------------|----------------------------------|
|       |                                                             | Catalyst (5 wt%)                  | T <sub>h</sub> (°C)/ time (h) | Conversion <sup>[b]</sup><br>(%) |
| 1     | C <sub>6</sub> H <sub>5</sub> OH                            | Ru/Al <sub>2</sub> O <sub>3</sub> | 90/ 3.5                       | 95.6 <sup>[c]</sup>              |
| 2     | 1.1:1 or Li(C <sub>6</sub> H <sub>5</sub> O) <sup>[a]</sup> | Ru/Al <sub>2</sub> O <sub>3</sub> | 90/ 3.5                       | 97.0                             |
| 3     |                                                             |                                   | 60/ 3.5                       | 99.6                             |
| 4     |                                                             | Rh/Al <sub>2</sub> O <sub>3</sub> | 90/ 3.5                       | 95.1                             |
| 5     |                                                             | Pd/C                              | 90/ 3.5                       | 93.0                             |
| 6     |                                                             | Pt/C                              | 90/ 3.5                       | 81.2                             |
| 7     | 2:1 <sup>[a]</sup>                                          | Ru/Al <sub>2</sub> O <sub>3</sub> | 90/ 3.5                       | 99.1                             |
| 8     |                                                             |                                   | 60/ 3.5                       | 99.7                             |
| 9     | 1:2 <sup>[a]</sup>                                          | Ru/Al <sub>2</sub> O <sub>3</sub> | 90/ 3.5                       | 96.3                             |
| 10    | 1:6 <sup>[a]</sup>                                          | Ru/Al <sub>2</sub> O <sub>3</sub> | 90/ 3.5                       | 87.0                             |

<sup>[a]</sup> Hydrogenation reaction was performed using the as-synthesized samples. <sup>[b]</sup> the reaction conversion was quantified by using <sup>1</sup>H NMR. <sup>[c]</sup> data obtained in our previous work.<sup>1</sup>

**Table S2.** Solid-state hydrogen desorption of C<sub>6</sub>H<sub>11</sub>OH, hydrogenated sample of Li(C<sub>6</sub>H<sub>5</sub>O), and different molar ratios of LiOH/C<sub>6</sub>H<sub>5</sub>OH under vacuum.

| Entry | Sample<br>(LiOH/C <sub>6</sub> H <sub>5</sub> OH)           | Hydrogen desorption               |                               |                                  |
|-------|-------------------------------------------------------------|-----------------------------------|-------------------------------|----------------------------------|
|       |                                                             | Catalyst (5 wt%)                  | T <sub>d</sub> (°C)/ time (h) | Conversion <sup>[b]</sup><br>(%) |
| 1     | C <sub>6</sub> H <sub>11</sub> OH                           | Ru/Al <sub>2</sub> O <sub>3</sub> | 140/ 10                       | 15.2 <sup>[c]</sup>              |
| 2     |                                                             | Rh/Al <sub>2</sub> O <sub>3</sub> | 140/ 10                       | 14.9 <sup>[c]</sup>              |
| 3     |                                                             |                                   | 260/ 10                       | 21.7                             |
| 4     |                                                             | Pd/C                              | 140/ 10                       | 20.8                             |
| 5     |                                                             |                                   | 260/ 10                       | 97.5 <sup>[d]</sup>              |
| 6     |                                                             | Pt/C                              | 140/ 10                       | 33.6                             |
| 7     |                                                             |                                   | 260/ 10                       | 92.1 <sup>[d]</sup>              |
| 8     | 1.1:1 or Li(C <sub>6</sub> H <sub>5</sub> O) <sup>[a]</sup> | Ru/Al <sub>2</sub> O <sub>3</sub> | 140/ 10                       | 34.4                             |
| 9     |                                                             | Rh/Al <sub>2</sub> O <sub>3</sub> | 140/ 10                       | 31.9                             |
| 10    |                                                             | Pd/C                              | 140/ 10                       | 35.9                             |
| 11    |                                                             | Pt/C                              | 140/ 10                       | 29.8                             |
| 12    | 2:1 <sup>[a]</sup>                                          | Ru/Al <sub>2</sub> O <sub>3</sub> | 140/ 10                       | 48.1                             |
| 13    | 1:2 <sup>[a]</sup>                                          | Ru/Al <sub>2</sub> O <sub>3</sub> | 140/ 10                       | 29.5                             |
| 14    | 1:6 <sup>[a]</sup>                                          | Ru/Al <sub>2</sub> O <sub>3</sub> | 140/ 10                       | 20.0                             |

<sup>[a]</sup> Direct dehydrogenation reaction was performed using the hydrogenated products. <sup>[b]</sup> the reaction conversion was quantified by using <sup>1</sup>H NMR. <sup>[c]</sup> data obtained in our previous work.<sup>1</sup> <sup>[d]</sup> exhibited high selectivity toward benzene formation.

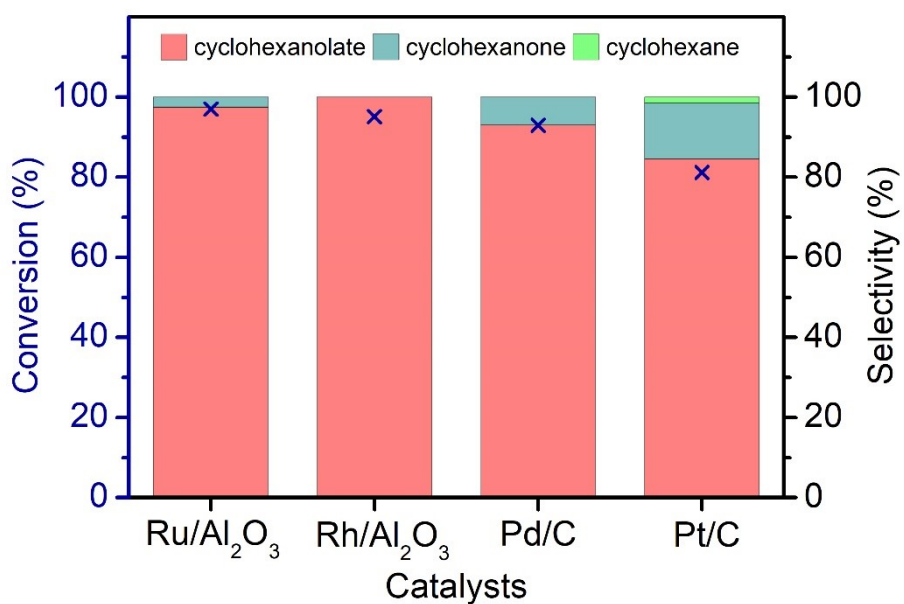

**Figure S1.** Product selectivity from hydrogenation of as-synthesized 1.1:1 LiOH/C<sub>6</sub>H<sub>5</sub>OH at 90 °C, 3.5 h catalyzed by 5 wt% metal catalysts with a molar ratio of metal catalyst to phenoxide of 1:10.

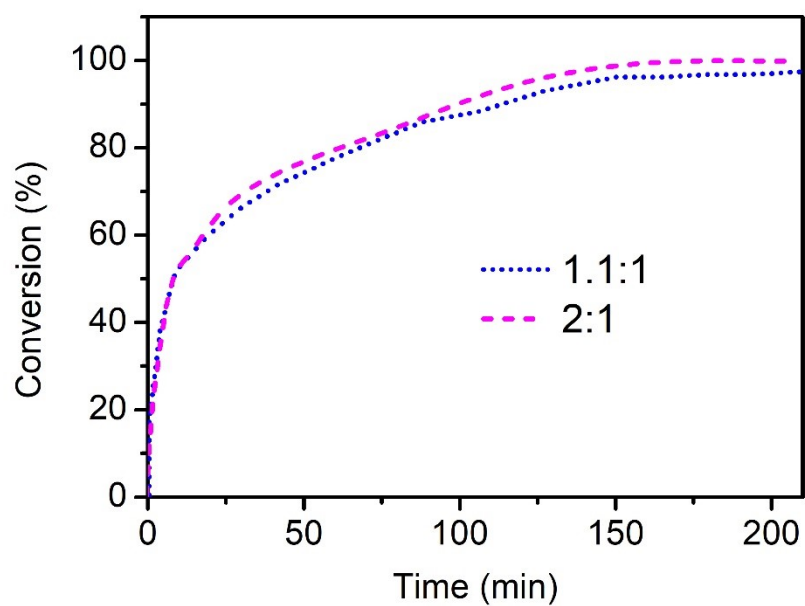

**Figure S2.** Hydrogen uptake curves of as-synthesized 1.1:1 and 2:1 LiOH/C<sub>6</sub>H<sub>5</sub>OH over 5 wt% Ru/Al<sub>2</sub>O<sub>3</sub> under 30 bar of H<sub>2</sub> at 90 °C with a molar ratio of metal catalyst to phenoxide of 1:10.

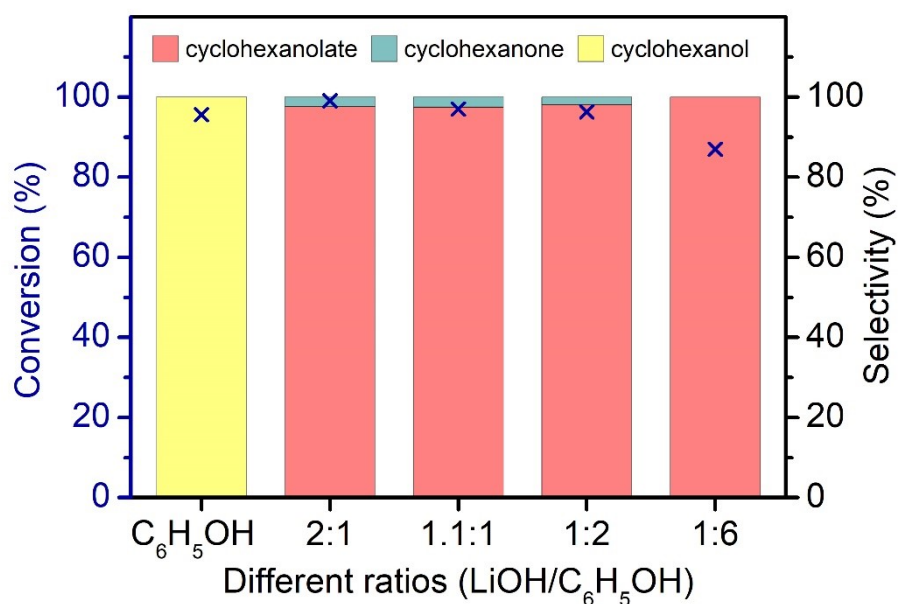

**Figure S3.** Product selectivity from hydrogenation of as-synthesized different ratios of LiOH/C<sub>6</sub>H<sub>5</sub>OH at 90 °C, 3.5 h catalyzed by 5 wt% Ru/Al<sub>2</sub>O<sub>3</sub> with a molar ratio of metal catalyst to phenol or phenoxide of 1:10.

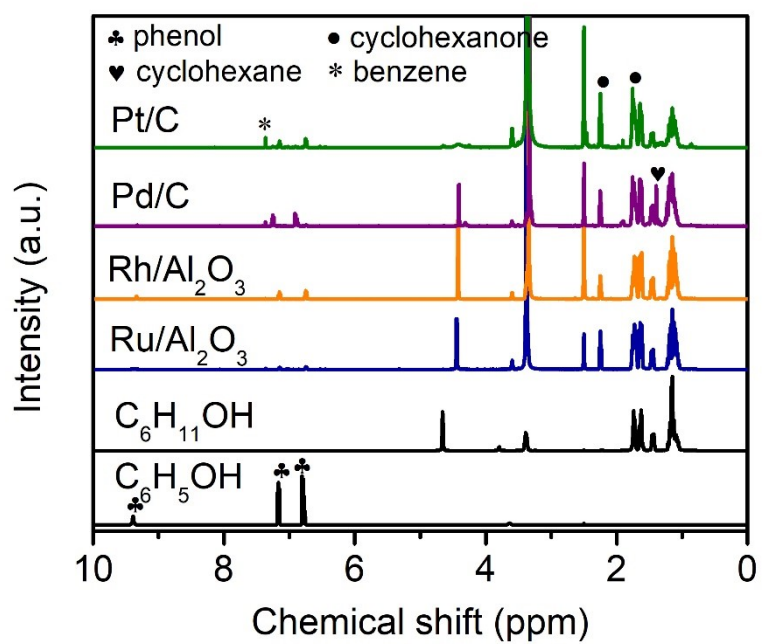

**Figure S4.**  $^1\text{H}$  NMR spectra of the dehydrogenation of cyclohexanol at  $140\text{ }^\circ\text{C}$ , 10 h over different metal catalysts with a molar ratio of metal catalyst to cyclohexanol of 1:10 in  $\text{DMSO-}d_6$ .

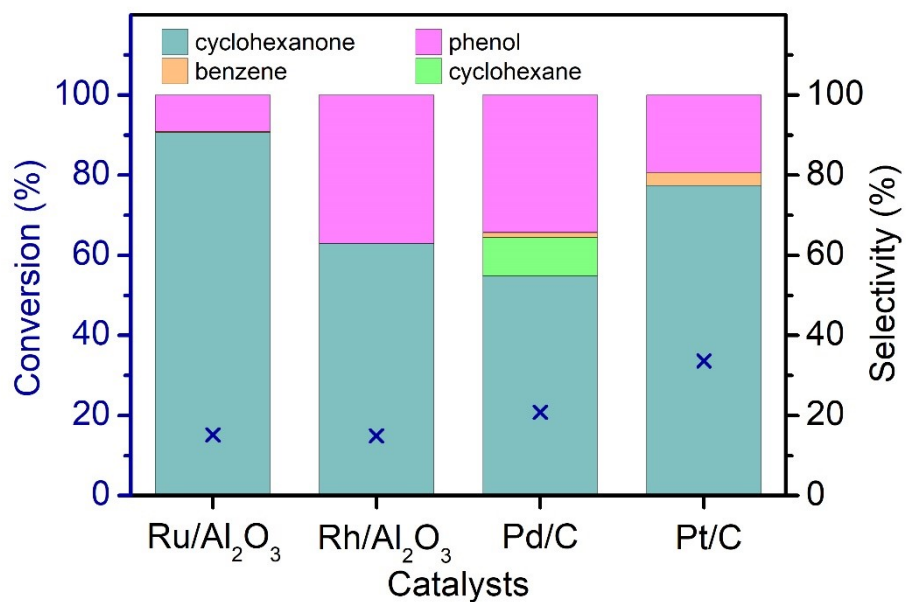

**Figure S5.** Product selectivity from the dehydrogenation of cyclohexanol at 140 °C, 10 h over different metal catalysts with a molar ratio of metal catalyst to cyclohexanol of 1:10.

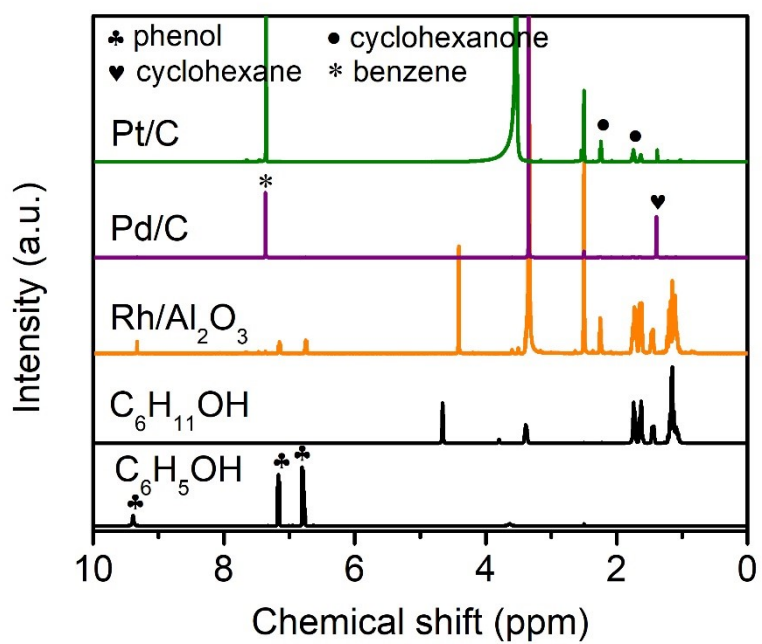

**Figure S6.** <sup>1</sup>H NMR spectra of the dehydrogenation of cyclohexanol at 260 °C, 10 h over different metal catalysts with a molar ratio of metal catalyst to cyclohexanol of 1:10 in DMSO-*d*<sub>6</sub>.

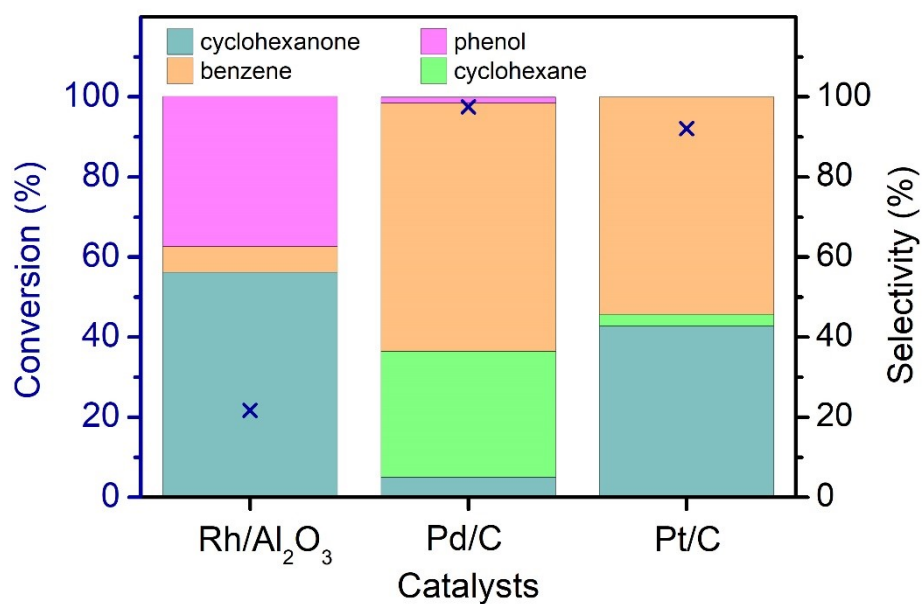

**Figure S7.** Product selectivity from the dehydrogenation of cyclohexanol at 260 °C, 10 h over different metal catalysts with a molar ratio of metal catalyst to cyclohexanol of 1:10.

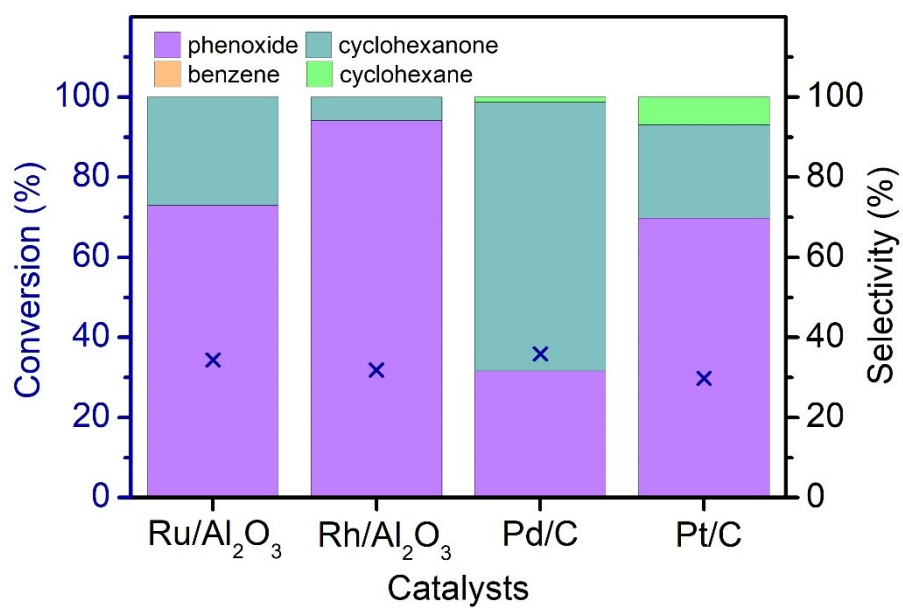

**Figure S8.** Product selectivity from the dehydrogenation of hydrogenated Li(C<sub>6</sub>H<sub>5</sub>O) at 140 °C, 10 h catalyzed by 5 wt% metal catalysts.

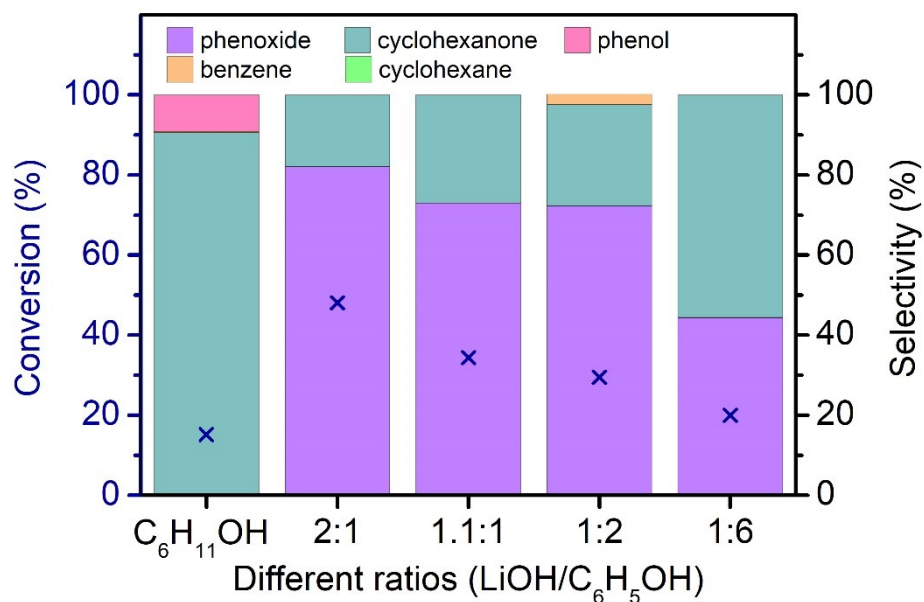

**Figure S9.** Product selectivity from the dehydrogenation of hydrogenated samples synthesized from different ratios of LiOH/C<sub>6</sub>H<sub>5</sub>OH at 140 °C, 10 h catalyzed by 5 wt% metal catalysts.

## Reference

1. N. I. Nordin, K. C. Tan, H. Wen, X. Ju, W. Zhou, H. Wu, T. He, P. Chen and Y. S. Chua, *ACS Appl. Energy Mater.*, 2025, 8, 6270–6279.
